# Supplementary material for: Extracellular matrix stiffness controls osteogenic differentiation of mesenchymal stem cells mediated by integrin α5
Source: PubMed Central journal article supplement (PMC5831741; doi:10.1186/s13287-018-0798-0), 2018-03-01

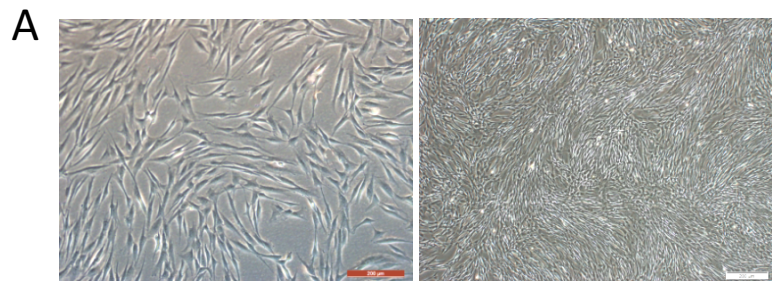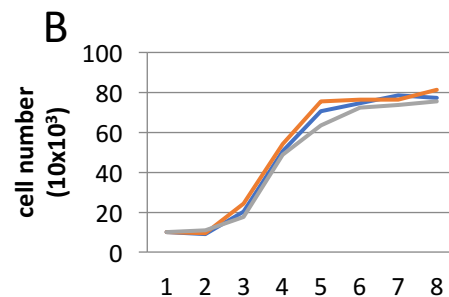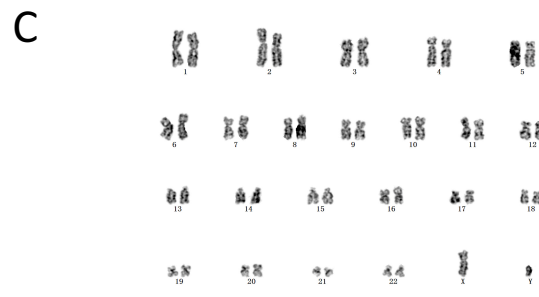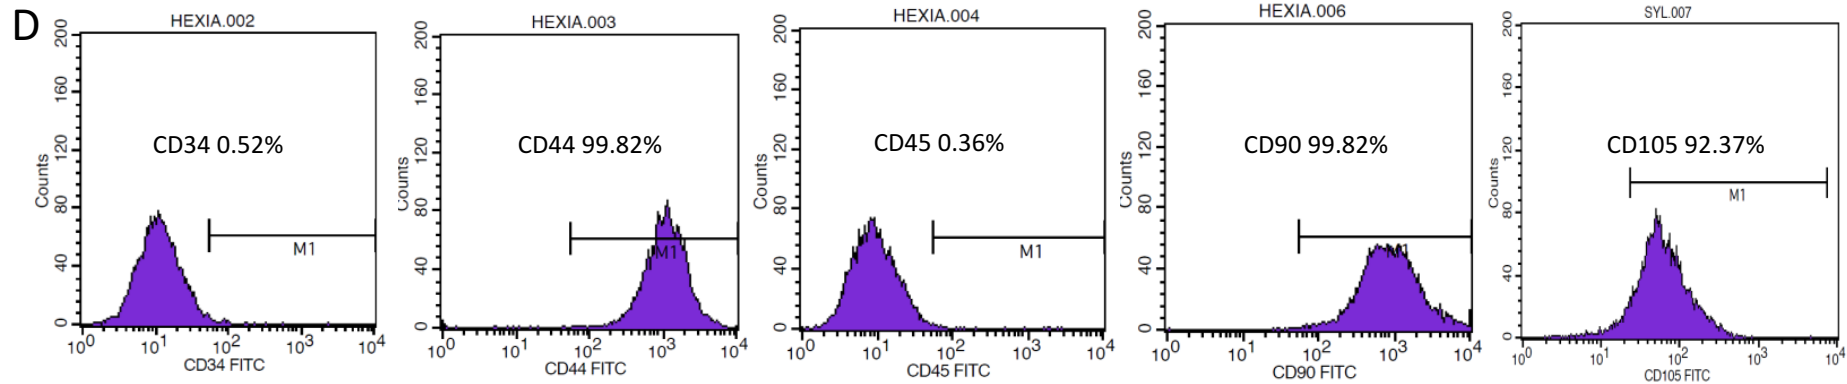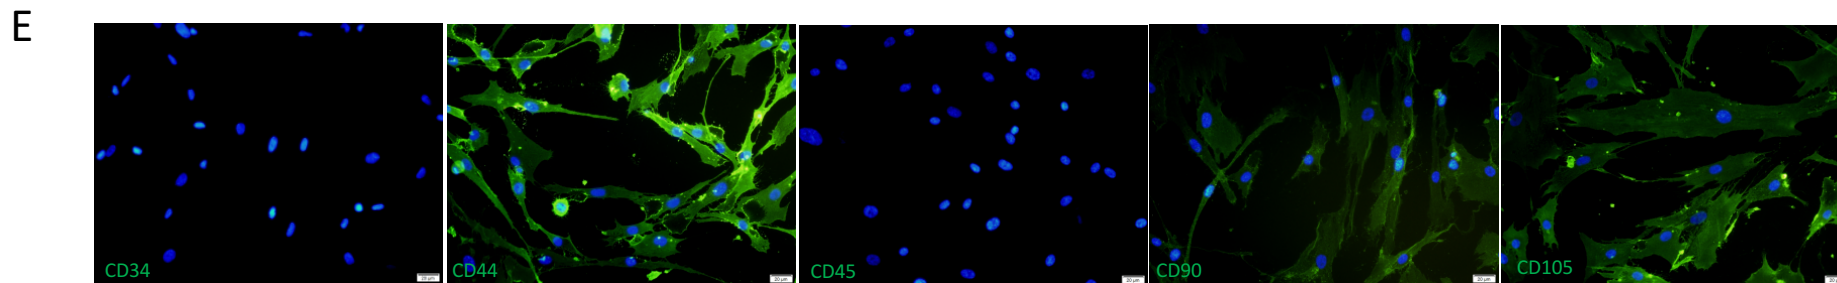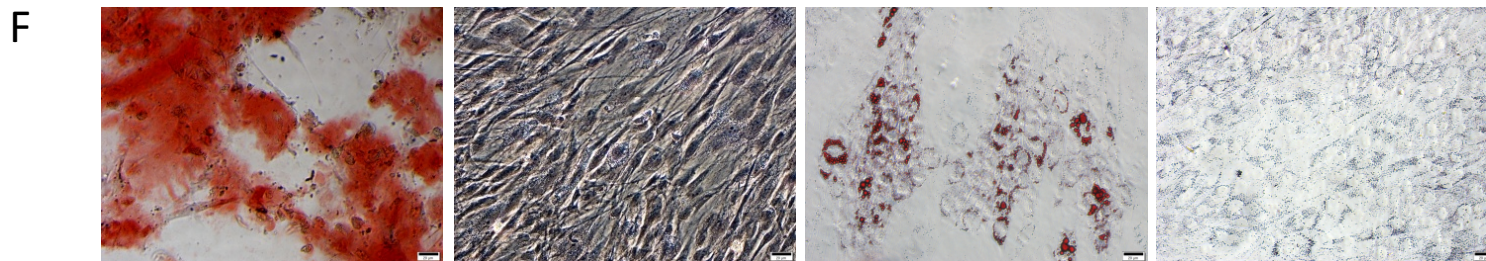

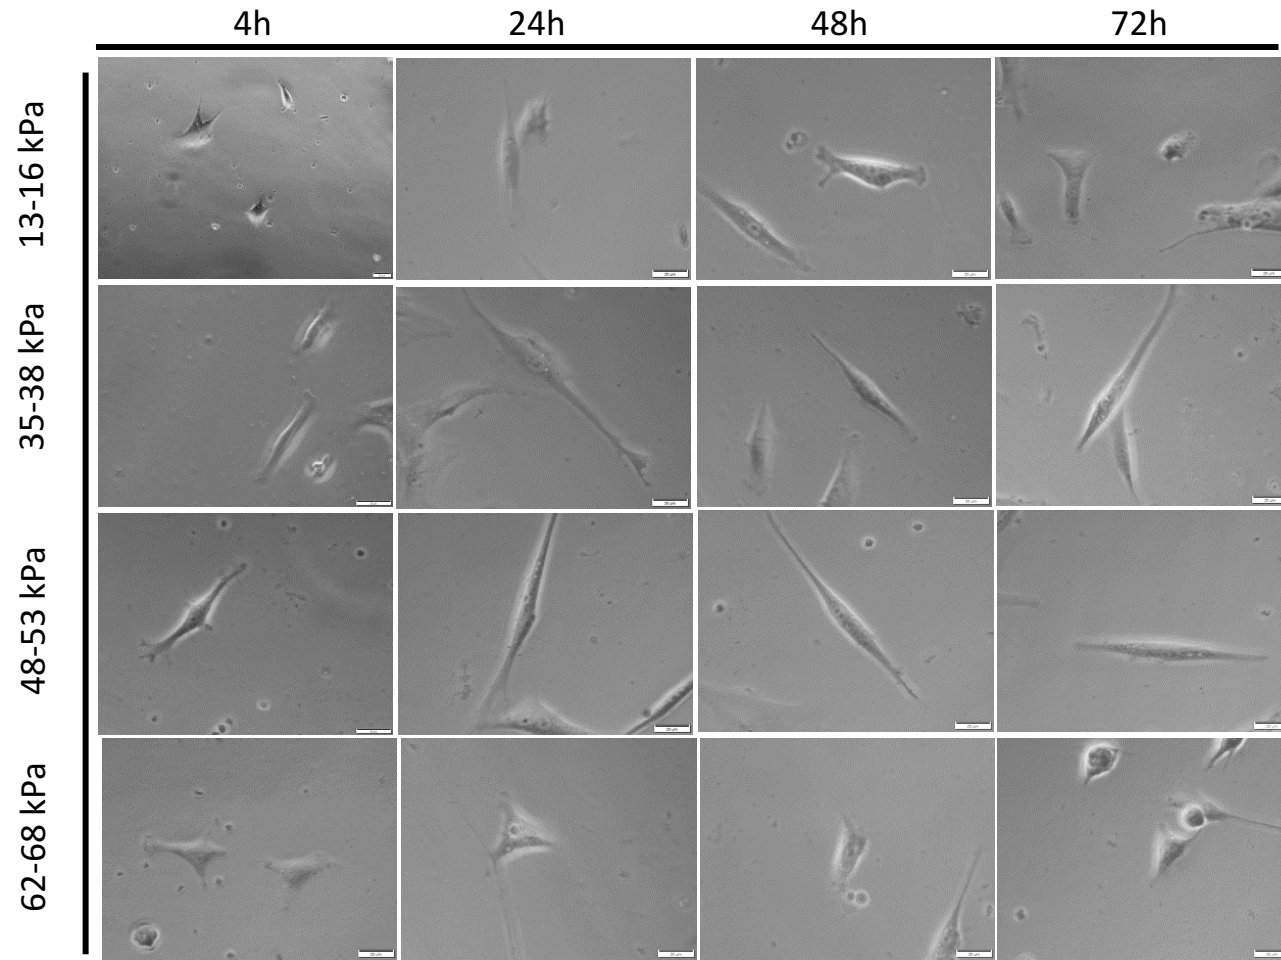

13-16 kPa

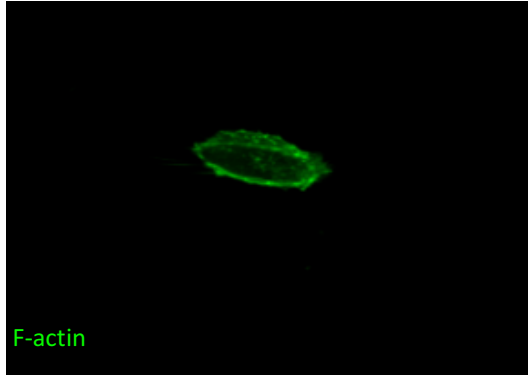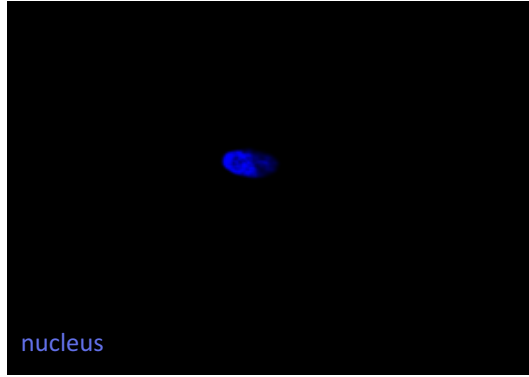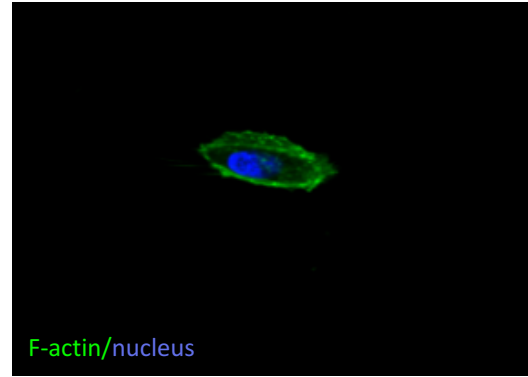

62-68 kPa

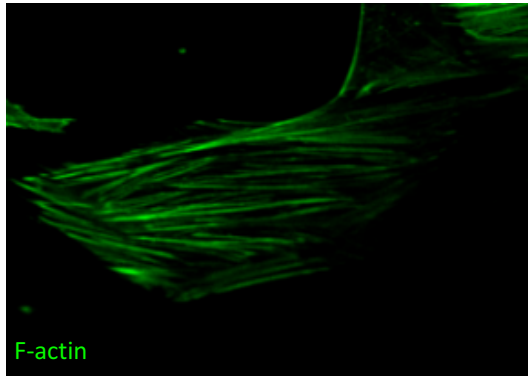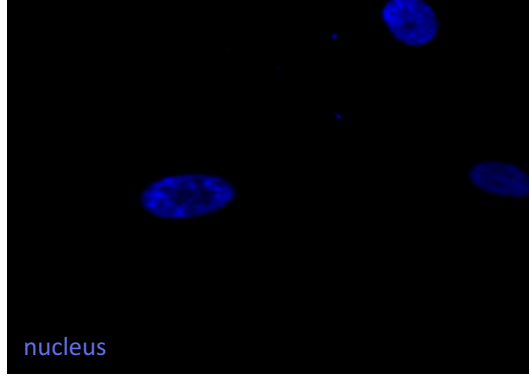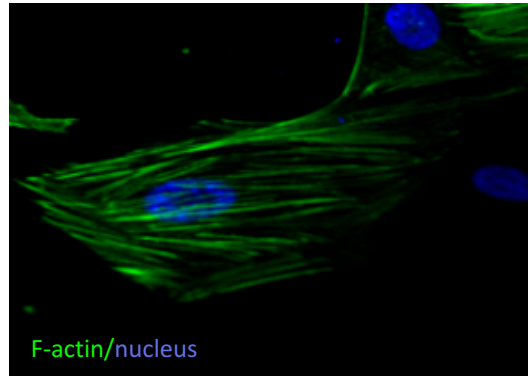

TCP

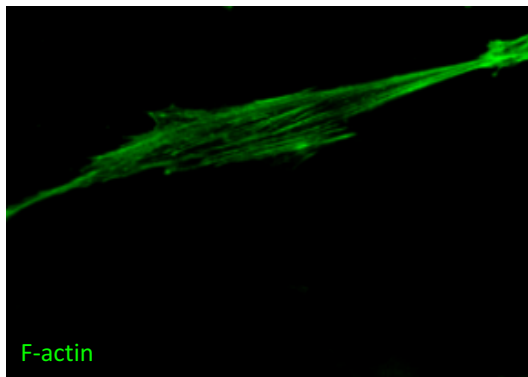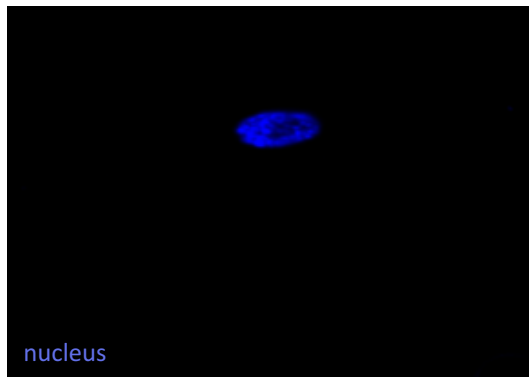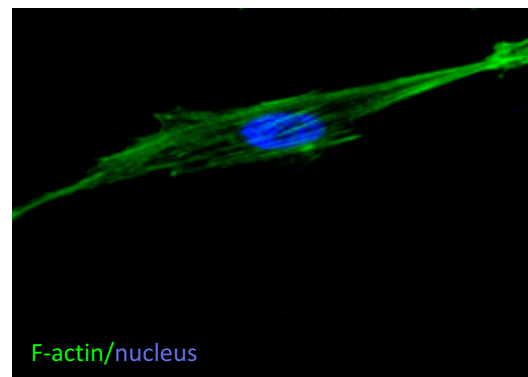

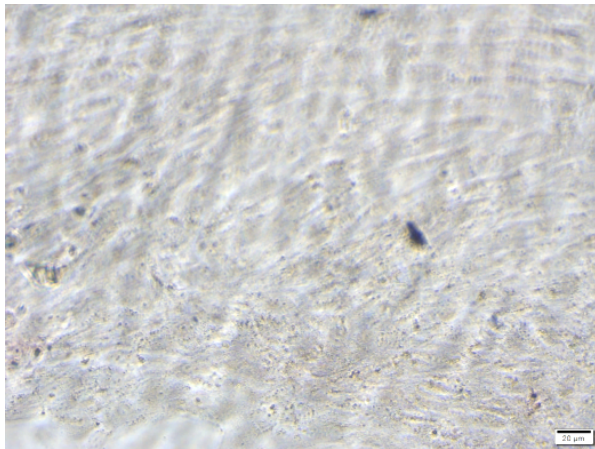

13-16 kPa

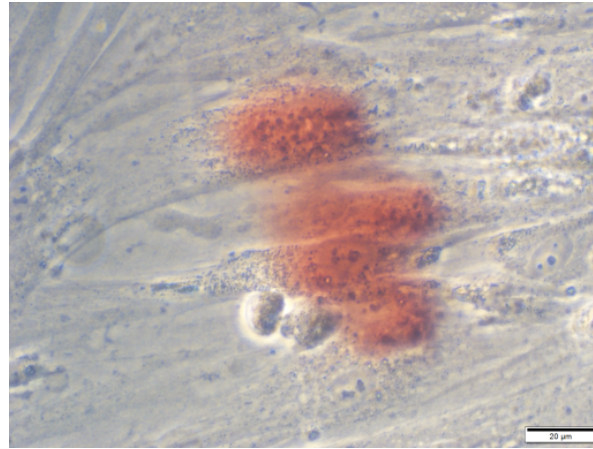

62-68 kPa

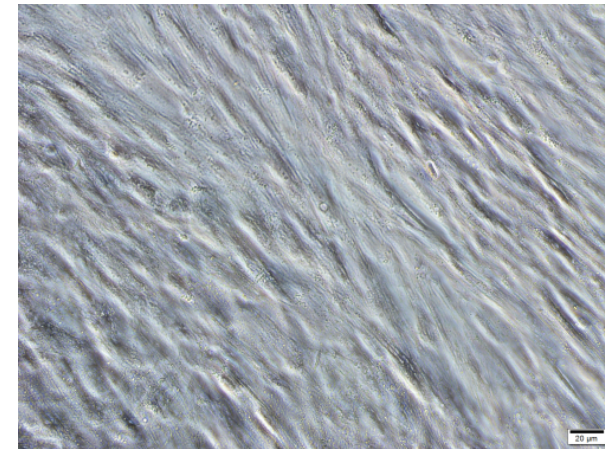

TCP

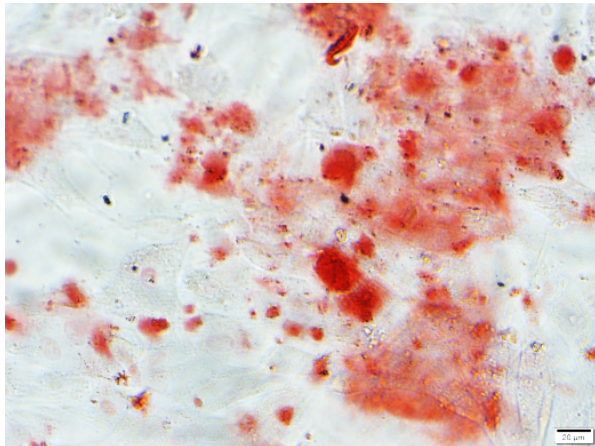

Osteogenic medium +13-16 kPa

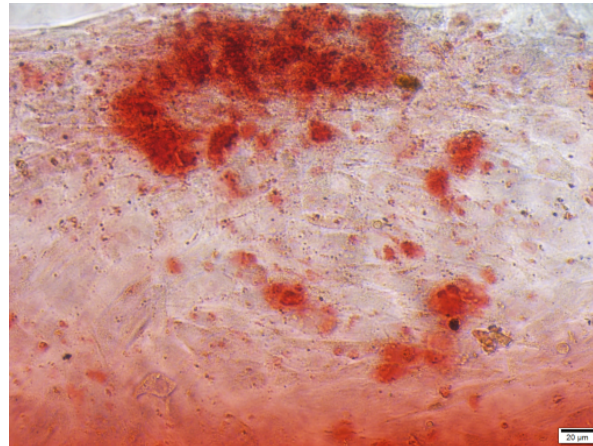

Osteogenic medium + 62-68 kPa

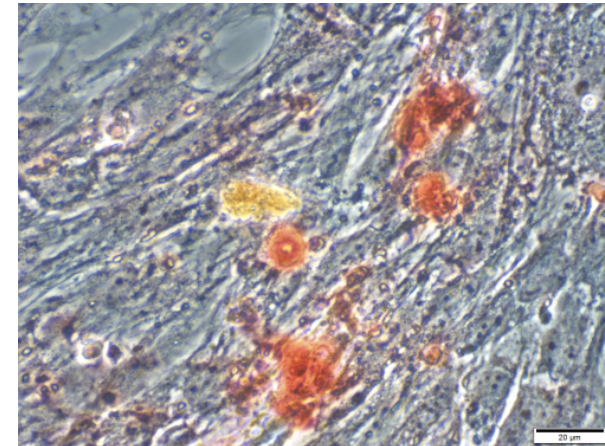

Osteogenic medium+ TCP

13-16 kPa

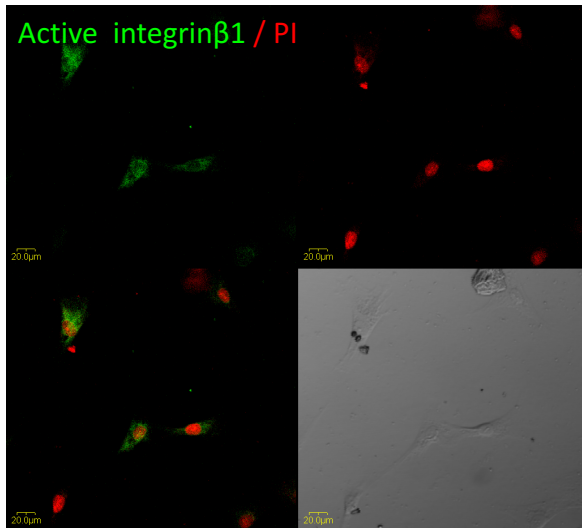

62-68 kPa

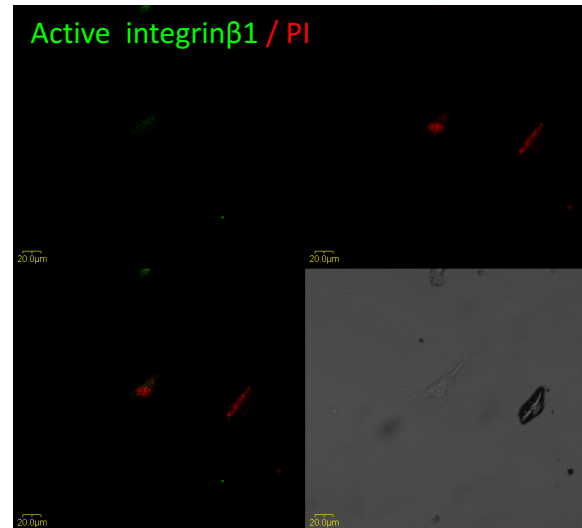

TCP

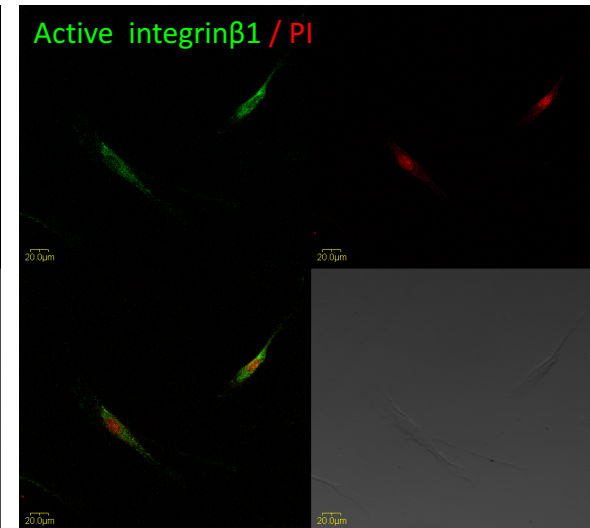

with anti- $\alpha$ 5 antibody

without anti- $\alpha$ 5 antibody

ALP

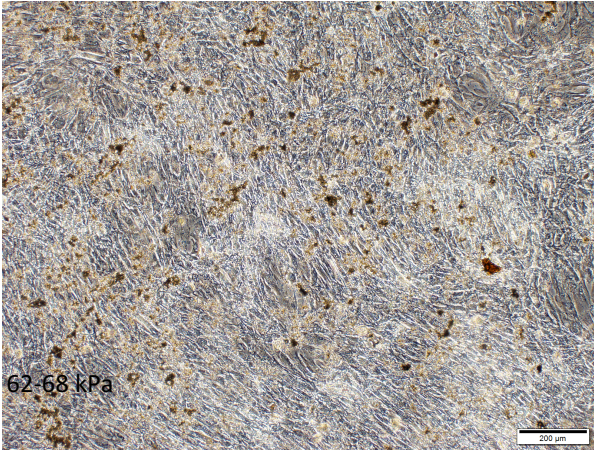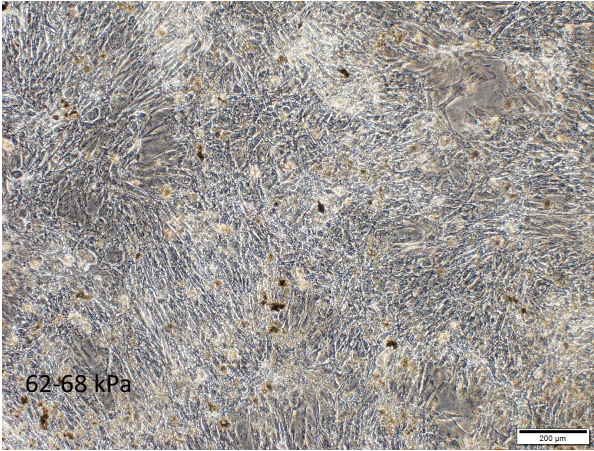

Calcium deposits

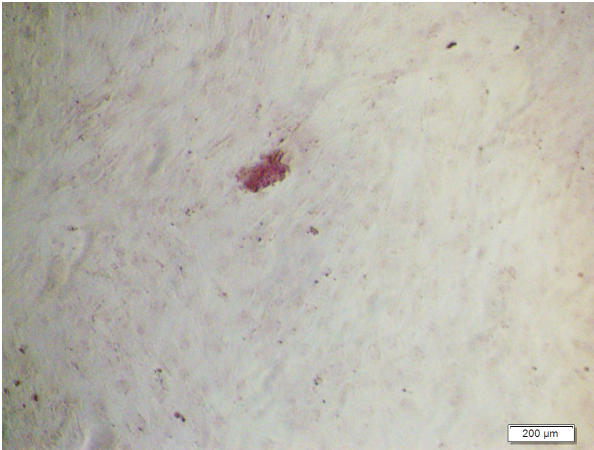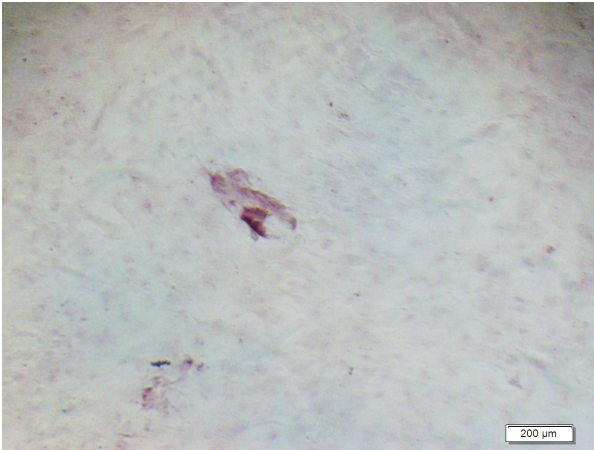

Supplement: 13287_2018_798_MOESM1_ESM.pdf [file 13287_2018_798_MOESM1_ESM.pdf]
